# Supplementary material for: Bacteriophage Therapy for Difficult-to-Treat Infections: The Implementation of a Multidisciplinary Phage Task Force (The PHAGEFORCE Study Protocol)
Source: MDPI journal article supplement (doi:10.3390/v13081543), 2021-08-05
Supplement: s1 [file s1]

## List of abbreviations

|                      |                                                                   |
|----------------------|-------------------------------------------------------------------|
| AE                   | Adverse event                                                     |
| ASA                  | American Society of Anesthesiologists                             |
| Cas                  | CRISPR-associated system                                          |
| CBC                  | Complete blood count                                              |
| CBL                  | Coordination group for Bacteriophage therapy Leuven               |
| CRISPR               | Clustered Regularly Interspaced Short Palindromic Repeats         |
| CRS                  | Chronic rhinosinusitis                                            |
| DSMB                 | Data Safety Monitoring Board                                      |
| eCRF                 | Electronic case report form                                       |
| EOP                  | Efficiency of plating                                             |
| EPOS                 | European Position Paper on Rhinosinusitis and Nasal Polyps        |
| EU                   | European Union                                                    |
| GCP                  | Good clinical practice                                            |
| GRADE                | Grading of Recommendations Assessment, Development and Evaluation |
| ICU                  | Intensive Care Unit                                               |
| MDR-PA               | Multidrug-resistant <i>Pseudomonas aeruginosa</i>                 |
| MRSA                 | Methicillin-resistant <i>Staphylococcus aureus</i>                |
| MSI                  | Musculoskeletal infection                                         |
| <i>P. aeruginosa</i> | <i>Pseudomonas aeruginosa</i>                                     |
| PRO                  | Patient-reported outcomes                                         |
| PROMIS               | Patient-reported outcomes measurement information system          |
| QAMH                 | Queen Astrid Military Hospital                                    |
| qPCR                 | Quantitative polymerase chain reaction                            |
| R-M                  | Restriction-modification                                          |
| <i>S. aureus</i>     | <i>Staphylococcus aureus</i>                                      |
| SAE                  | Serious adverse event                                             |
| SNOT-22              | Sino-nasal outcome test-22                                        |
| SOFA                 | Sequential Organ Failure Assessment                               |
| TTP                  | Time-to-positivity                                                |
| VAS                  | Visual Analogue Scale                                             |
| WHO                  | World Health Organisation                                         |
